# Supplementary material for: Ahnak promotes tumor metastasis through transforming growth factor-β-mediated epithelial-mesenchymal transition
Source: PubMed Central journal article supplement (PMC6158194; doi:10.1038/s41598-018-32796-2), 2018-09-26
Supplement: 41598_2018_32796_MOESM1_ESM.pdf [file 41598_2018_32796_MOESM1_ESM.pdf]

**Ahnak promotes tumor metastasis through transforming growth factor- $\beta$ -mediated epithelial-mesenchymal transition**

Mira Sohn\*, Sunmee Shin\*, Jung-Yeon Yoo, Yookyung Goh, In Hye Lee #, and Yun Soo Bae#

Department of Life Sciences, Ewha Womans University, Seoul 120-750, Korea

\*These authors contributed equally to this work.

# Corresponding Author: Yun Soo Bae, Department of Life Science, Ewha Womans University, Seoul 120-750, Korea. [baeys@ewha.ac.kr](mailto:baeys@ewha.ac.kr), phone: 82-2-3277-2729, fax: 82-2-3277-3760; In Hye Lee, Department of Life Science, Ewha Womans University, Seoul 120-750, Korea. [lih3026@ewha.ac.kr](mailto:lih3026@ewha.ac.kr), phone: 82-2-3277-3032, fax: 82-2-3277-3760

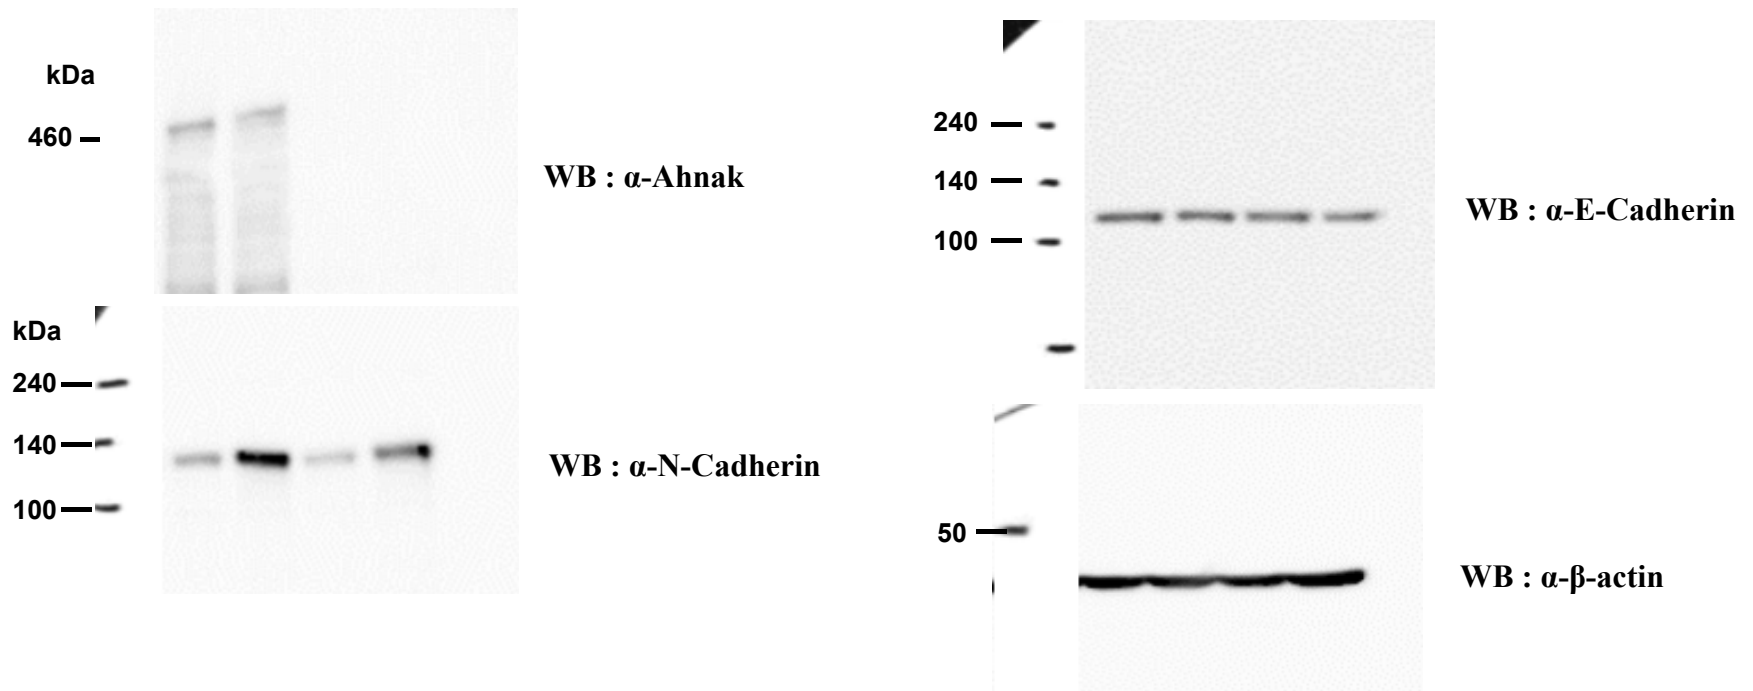

**Supplementary Figure S1. Requirement of Ahnak for TGF $\beta$ -induced EMT**

HaCaT cells were transfected, serum deprived, and stimulated with TGF $\beta$  (5 ng/mL) for 72 h. Cells were lysed and subjected to western blot (WB) analysis with the indicated antibodies.

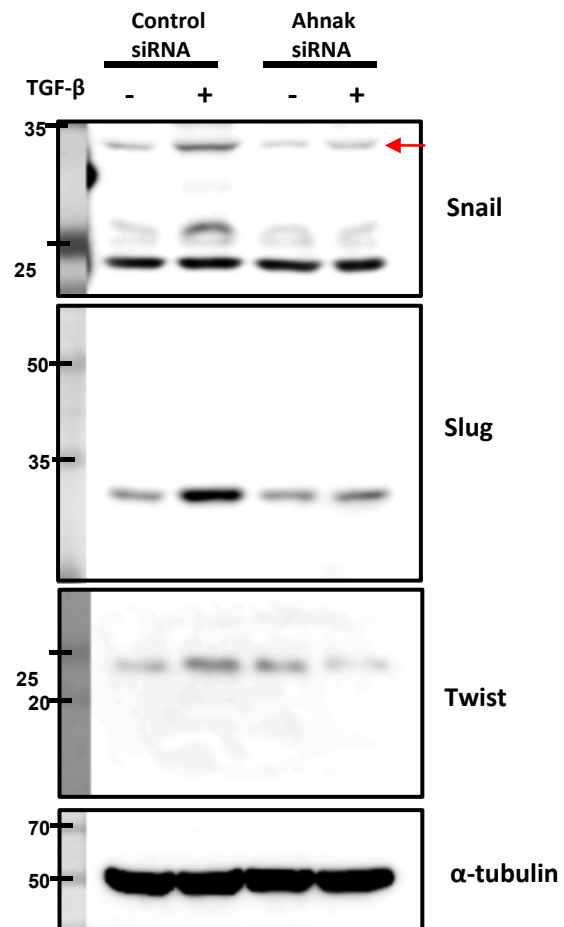

**Supplementary Figure S2. TGF $\beta$ -induced EMT markers expression in knockdown expression of Ahnak in HaCaT cells**

HaCaT cells were transfected, serum deprived, and stimulated with TGF $\beta$  (5 ng/mL) for 24 h. Cells were lysed and subjected to western blot (WB) analysis with the indicated antibodies.

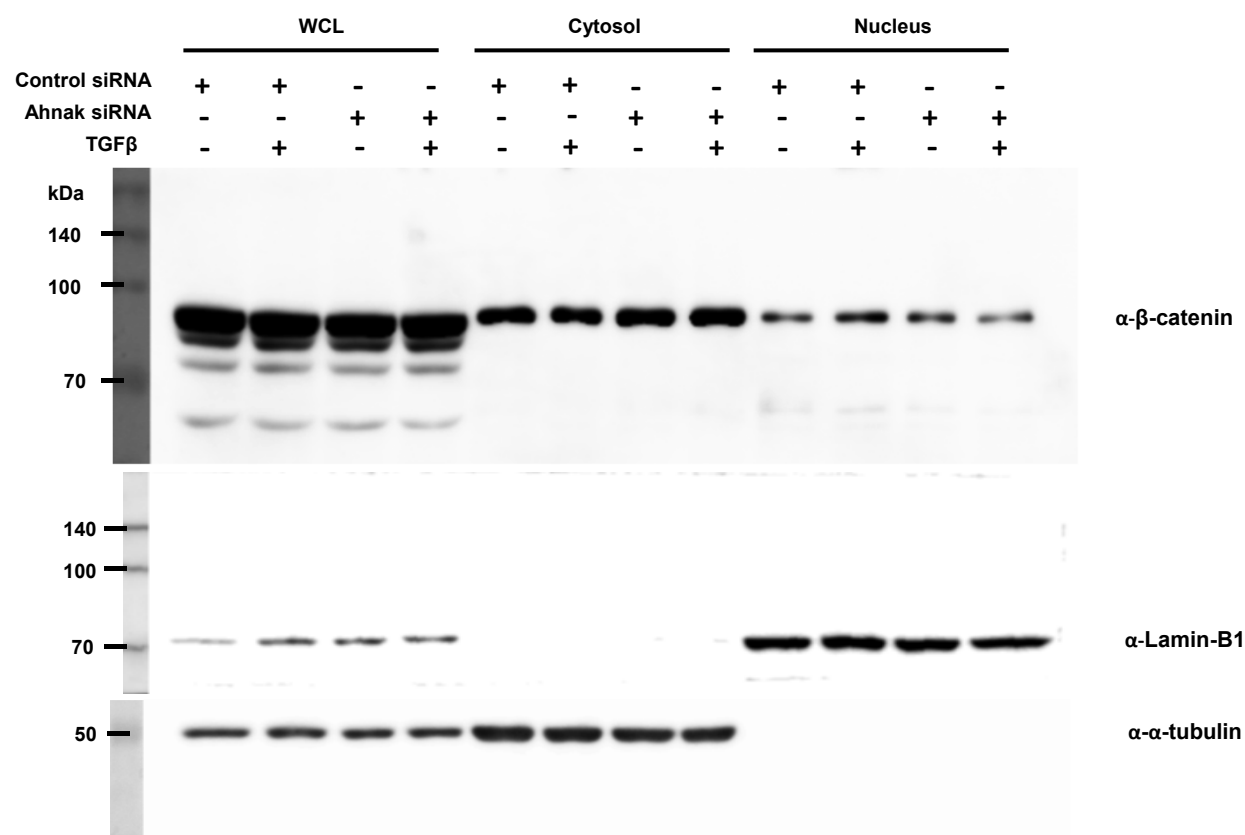

### Supplementary Figure S3. Effect of Ahnak on TGF $\beta$ -induced $\beta$ -catenin nuclear localization in HaCaT cells

HaCaT cells ( $6 \times 10^4$ ) cultured in 100mm culture dishes were transfected control siRNA or Ahnak siRNA as described above. HaCaT cells were serum starved for 16h and then incubated with or without TGF- $\beta$  (5ng/ml) for 1h. The nuclear fraction was isolated by the cell fractionation kit (Cell signaling; #9038) according to manufacturer's instruction.

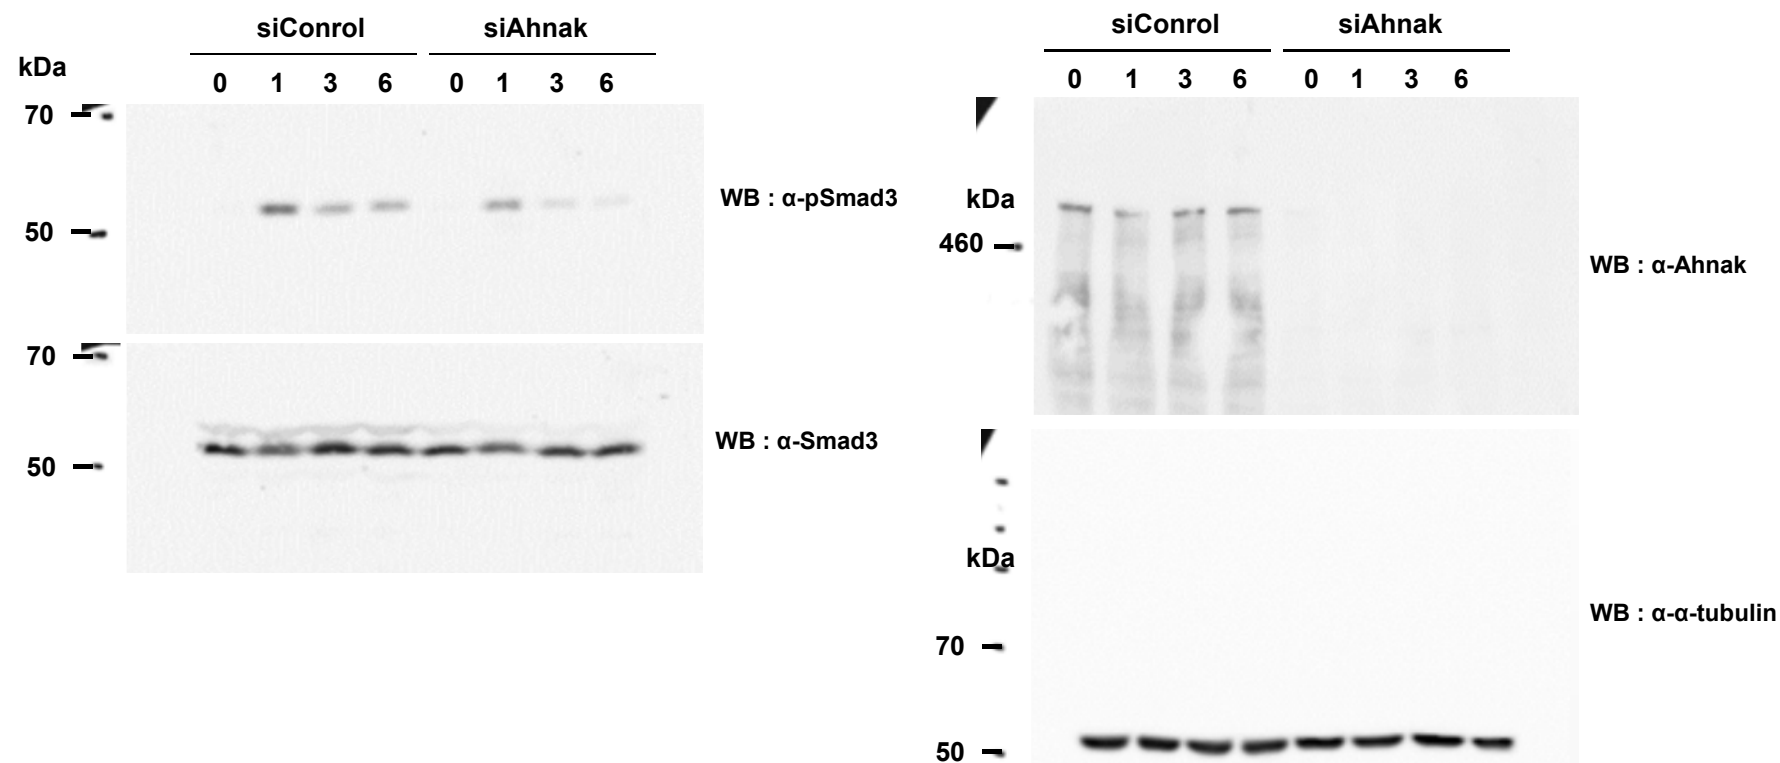

#### Supplementary Figure S4. Activation of TGF $\beta$ /Smad3 signaling by Ahnak

HaCaT cells were transfected with the indicated siRNA, serum starved, and stimulated with TGF $\beta$  (5 ng/mL) for the indicated time. Cells were lysed and subjected to western blot (WB) analysis with antibodies to p-Smad3, Smad3, Ahnak and actin.

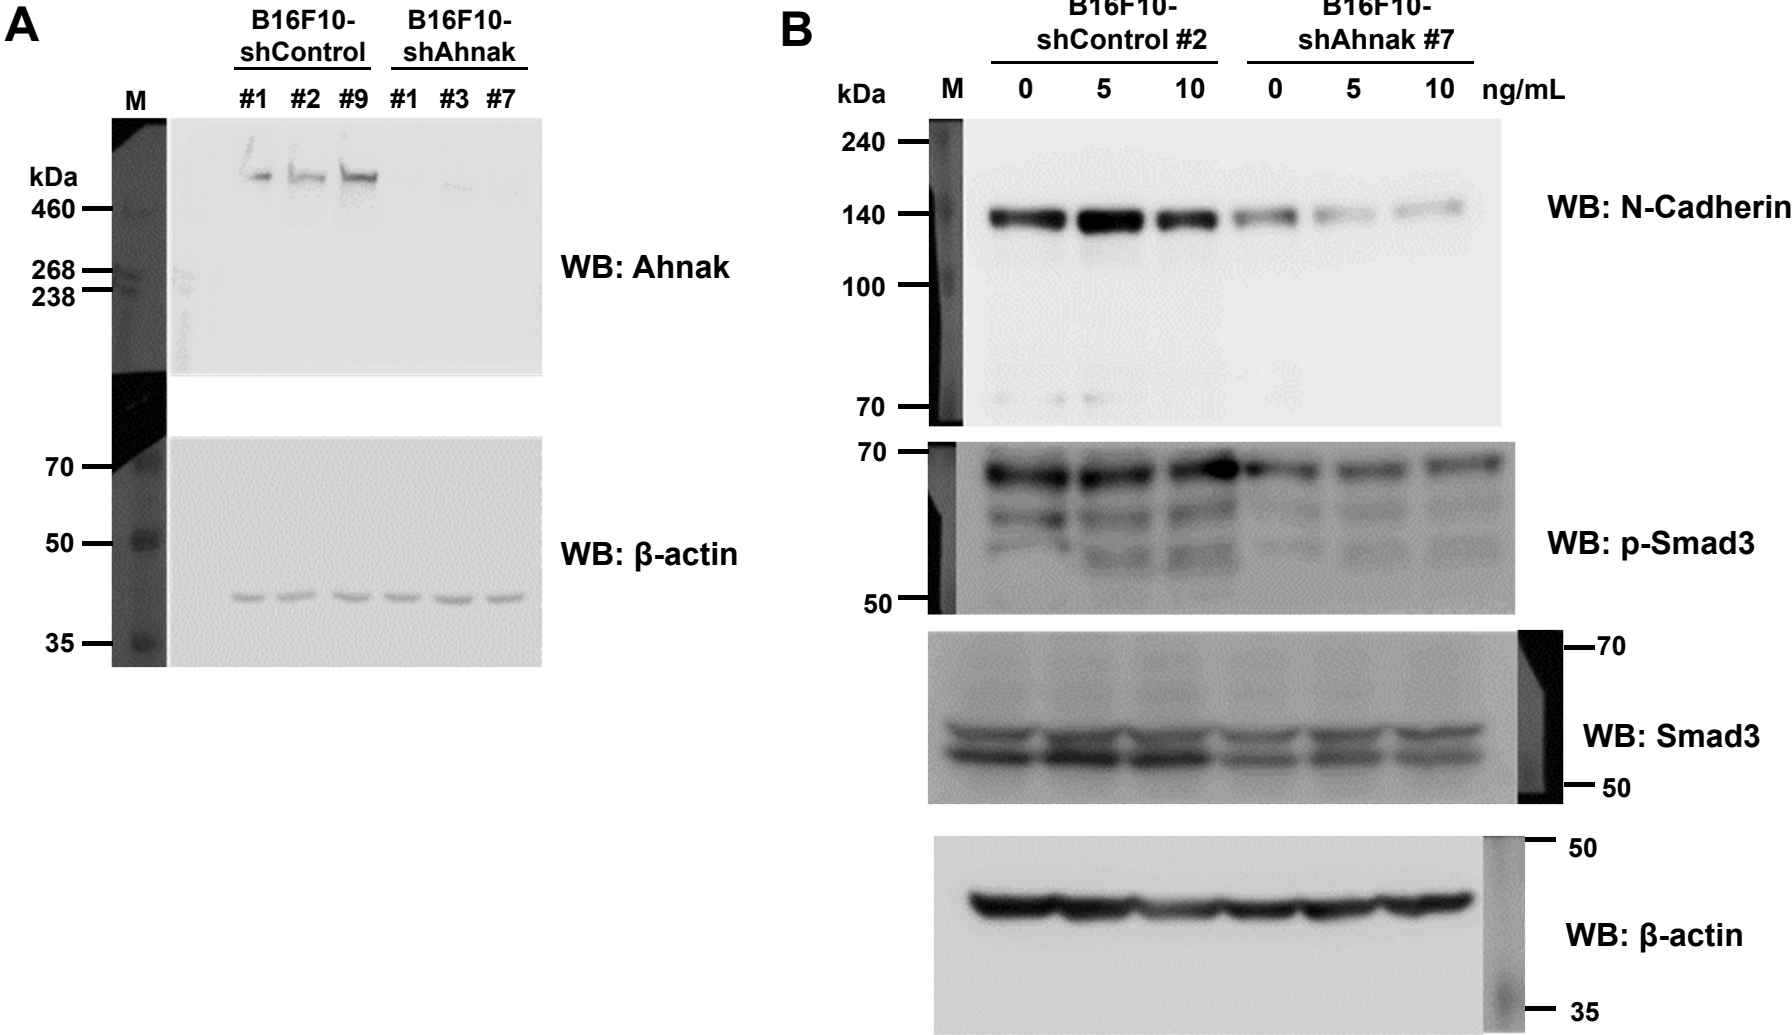

**Supplementary Figure S5. Ahnak regulates EMT-mediated melanoma cell migration and invasion**

(A) B16F10 melanoma cells were stably infected with pGIPZ lentivirus-shControl and shAhnak and selected by colony picking to generate monoclonal cell line. Each cell line was subjected to western blot (WB) analysis with the indicated antibodies. (B) Ahnak-depleted B16F10 stable cells were serum starved and stimulated with TGF $\beta$  (5 ng/mL) for 24 h. Cells were lysed and subjected to western blot (WB) analysis with the indicated antibodies.

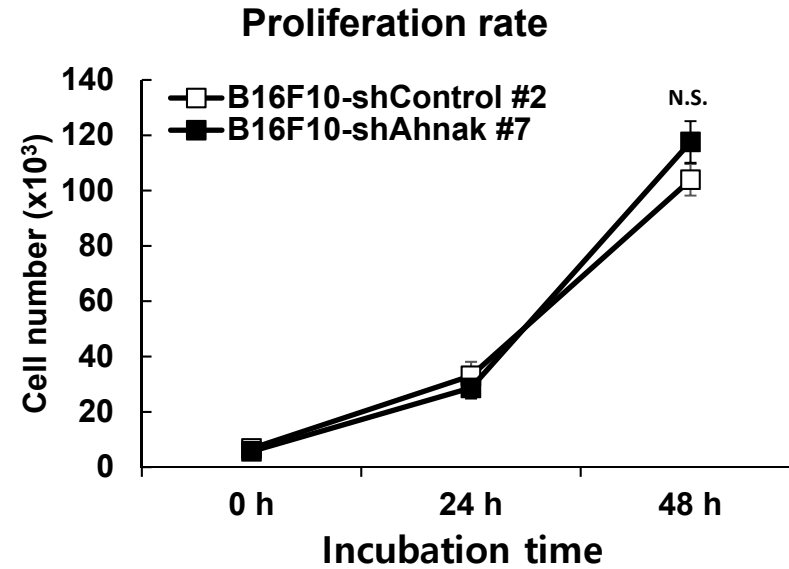

**Supplementary Figure S6. Proliferation rate of B16F10-shControl #2 and B16F10-shAhnak #7 cells**

Both cell lines (B16F10-shControl #2 and B16F10-shAhnak #7 cells) were cultured in 96well plates for the indicated incubation time. The cells were harvested and counted. The data are means  $\pm$  SEM of three independent experiments.
